# Supplementary material for: Study on the Explicit Formula of the Triangular Flat Shell Element Based on the Analytical Trial Functions for Anisotropy Material
Source: Hindawi journal article supplement (doi:10.1155/2013/486453), 2013-01-01
Supplement: f1 [file 486453.f1.docx]

Comparison of the analytical stress solutions

The results of ATF-TR5 and ATF-TR7 in Table 3 are recalculated using the analytical stress solutions of isotropy in Table 3(b). The results in Table 3(a) show that the element ATF-TR5A and ATF-TR7A, which are based on the analytical stress solutions of isotropy, can perform as well as the element ATF-TR5 and ATF-TR7. All of the elements based on the ATF perform better than S3.

Table 3 The results using the analytical stress solutions of anisotropy

| Mesh  Element | *θ* | 2×2 | 2×4 | 2×8 | 2×16 |
| --- | --- | --- | --- | --- | --- |
| S3 | 0 | 0.0726 | 0.1855 | 0.3035 | 0.3604 |
| 45 | 0.0126 | 0.0483 | 0.2076 | 1.0908 |
| 90 | 0.0883 | 0.3400 | 1.1821 | 3.1053 |
| ATF-TR5 | 0 | 0.4838 | 0.4814 | 0.5408 | 0.6396 |
| 45 | 0.9997 | 1.7910 | 3.4030 | 5.0761 |
| 90 | 5.9177 | 4.2597 | 4.3973 | 5.7013 |
| ATF-TR7 | 0 | 0.2864 | 0.42617 | 0.5069 | 0.5627 |
| 45 | 0.2191 | 0.6552 | 1.8858 | 3.7485 |
| 90 | 0.5630 | 1.6336 | 3.5687 | 5.3100 |

Table 3(a) The results using the analytical stress solutions of isotropy

| Mesh  Element | *θ* | 2×2 | 2×4 | 2×8 | 2×16 |
| --- | --- | --- | --- | --- | --- |
| S3 | 0 | 0.0726 | 0.1855 | 0.3035 | 0.3604 |
| 45 | 0.0126 | 0.0483 | 0.2076 | 1.0908 |
| 90 | 0.0883 | 0.3400 | 1.1821 | 3.1053 |
| ATF-TR5A | 0 | 0.5678 | 0.5739 | 0.5996 | 0.6711 |
| 45 | 5.8101 | 6.0548 | 6.0440 | 5.8760 |
| 90 | 7.1744 | 6.8483 | 6.8226 | 7.1443 |
| ATF-TR7A | 0 | 0.2866 | 0.4262 | 0.5069 | 0.5627 |
| 45 | 0.2191 | 0.6552 | 1.8859 | 3.7487 |
| 90 | 0.5630 | 1.6336 | 3.5687 | 5.3100 |

Table 3(b) The analytical stress solutions of the isotropic plane problem

| Item | 1 | 2 | 3 | 4 | 5 | 6 | 7 |
| --- | --- | --- | --- | --- | --- | --- | --- |
|  | 1 | 0 | 0 | 0 | *y* | 0 | *x* |
|  | 0 | 1 | 0 | *x* | 0 | *y* | 0 |
|  | 0 | 0 | 1 | 0 | 0 | -*x* | -*y* |
